# Supplementary material for: Phagocytosis Is the Sole Arm of Drosophila melanogaster Known Host Defenses That Provides Some Protection Against Microsporidia Infection
Source: Front Immunol. 2022 Apr 13;13:858360. doi: 10.3389/fimmu.2022.858360 (PMC9043853; doi:10.3389/fimmu.2022.858360)
Supplement: Supplementary file 10 [file Table_1.xlsx]

## Sheet: Feuil1
Supplementary table 1: p-values of all survivals performed in this study							Paper: Phagocytosis is the sole arm of Drosophila melanogaster known host defenses that provides some protection against microsporidia infection
Gene	replicate	PBS p-value	PBS p-signif	Infected p-value	Infected p-signif		Legend
Myd88c03881	1	0.0326	* (-)	0.0851	ns		(-): less resistant
	2	0.0031	** (-)	0.0015	** (-)		(+): more resistant
	3	<0.0001	**** (-)	0.0010	*** (-)		compared to wild-type controls
	4	0.6447	ns	0.2015	ns
	5	0.0092	** (-)	0.2130	ns		Statistics for PBS injected flies are shown in columns C & D while statistics for Infected flies are shown in columns E & F
Kenny	1	<0.0001	**** (-)	0.5815	ns
	2	<0.0001	**** (-)	0.9458	ns
	3	0.0031	** (-)	0.3864	ns
	4	0.5670	ns	0.4796	ns
ΔAMPs	1	<0.0001	**** (-)	0.0141	ns
	2	0.8453	ns	0.0009	*** (+)
	3	0.4704	ns	0.0176	* (+)
	4	0.0716	ns	0.7534	ns
	5	0.3970	ns	0.0259	* (-)
basket	1	0.9772	ns	0.3733	ns
	2	0.1006	ns	0.1236	ns
Ask1	1	0.1715	ns	<0.0001	**** (+)
	2	0.2921	ns	0.0012	** (-)
	3	0.7129	ns	0.6970	ns
p38b	1	0.2726	ns	0.7807	ns
	2	0.6023	ns	<0.0001	**** (-)
Duox	1	0.7981	ns	<0.0001	**** (+)
	2	0.7769	ns	0.9365	ns
	3	0.5524	ns	0.8922	ns
Nox	1	0.1687	ns	0.0518	ns
	2	0.6744	ns	0.7993	ns
	3	<0.0001	**** (-)	<0.0001	**** (+)
NOSΔ15	1	0.0023	** (-)	<0.0001	**** (-)
	2	0.0330	* (-)	<0.0001	**** (-)
	3	0.3699	ns	<0.0001	**** (-)
PGRP-LE (RNAi)	1	0.0004	*** (-)	<0.0001	**** (+)
	2	0.0113	* (-)	0.0046	** (+)
	3	<0.0001	**** (-)	<0.0001	**** (+)
PGRP-LE112	1	0.9711	ns	0.6686	ns
	2	0.0372	* (+)	<0.0001	**** (+)
	3	0.6633	ns	<0.0001	**** (+)
	4	0.5350	ns	0.0492	* (+)
Atg7d14/Atg7d77	1	0.1304	ns	<0.0001	**** (-)
	2	0.1698	ns	<0.0001	**** (-)
	3	0.0987	ns	<0.0001	**** (-)
	4	0.5470	ns	0.0366	* (+)
PPO1Δ	1	0.0226	* (-)	<0.0001	**** (+)
	2	0.1198	ns	0.0181	* (+)
	3	0.0036	** (-)	0.0006	*** (+)
PPO2Δ	1	0.0021	** (-)	<0.0001	**** (-)
	2	0.0004	*** (-)	0.0272	* (-)
	3	0.0097	** (-)	0.0059	** (-)
PPO1Δ,2Δ	1	<0.0001	**** (-)	<0.0001	**** (-)
	2	<0.0001	**** (-)	0.1076	ns
	3	<0.0001	**** (-)	<0.0001	**** (-)
Hemoless	1	0.3132	ns	0.0006	*** (-)
	2	0.6544	ns	0.0070	** (-)
	3	0.2226	ns	<0.0001	**** (-)
	4	0.4396	ns	<0.0001	**** (-)
	5	0.4396	ns	0.0002	*** (-)
	6	0.4396	ns	0.0002	*** (-)
	7	0.4396	ns	0.0363	* (-)
Latex beads	1	0.0315	* (-)	<0.0001	**** (-)
	2	0.1509	ns	<0.0001	**** (-)
	3	0.0160	* (-)	<0.0001	**** (-)
	4	0.1509	ns	<0.0001	**** (-)
pvf2	1	0.2383	ns	0.9529	ns
	2	0.5204	ns	0.0069	** (-)
eiger	1	0.0235	* (-)	<0.0001	**** (-)
	2	<0.0001	**** (-)	<0.0001	**** (-)
	3	0.0038	** (-)	0.0004	*** (-)
upd3	1	<0.0001	**** (-)	<0.0001	**** (-)
	2	<0.0001	**** (-)	<0.0001	**** (-)
	3	0.0069	** (-)	<0.0001	**** (-)
Atg7 (RNAi)	1	0.3329	ns	0.0033	** (+)
	2	0.9796	ns	0.0009	*** (+)
	3	0.6371	ns	0.0004	*** (+)
Dicer-2	1	0.0698	ns	0.2263	ns
	2	0.0078	** (-)	<0.0001	**** (-)
	3	<0.0001	**** (-)	<0.0001	**** (-)
dSTING	1	0.0071	** (-)	0.0497	* (-)
	2	<0.0001	**** (-)	0.0031	** (+)
	3	0.7684	ns	0.1541	ns
Cytochalasin D	1	0.6906	ns	<0.0001	**** (-)
eater-/-	1	0.2905	ns	0.1396	ns
	2	0.1457	ns	<0.0001	**** (+)
	3	0.4873	ns	<0.0001	**** (+)
NimAMI11280	1	>0.9999	ns	0.0053	** (+)
	2	0.7706	ns	<0.0001	**** (+)
	3	0.1893	ns	<0.0001	**** (+)
	4	0.8593	ns	0.0311	* (+)
drprHP37013	1	0.0356	* (-)	0.0002	*** (+)
	2	0.3171	ns	0.3753	ns
	3	0.0958	ns	0.0007	*** (+)
NimB1	1	0.5104	ns	0.9192	ns
	2	0.1985	ns	<0.0001	**** (+)
NimB2 62	1	0.1395	ns	<0.0001	**** (+)
	2	0.4108	ns	0.0108	* (+)
	3	0.0975	ns	0.0064	** (+)
NimB2 65	1	0.0151	* (-)	0.1570	ns
	2	0.5211	ns	0.1370	ns
	3	0.0013	** (-)	0.0002	*** (+)
NimB4 55	1	0.3279	ns	0.6576	ns
	2	0.2902	ns	<0.0001	**** (+)
NimB4 62	1	0.1671	ns	<0.0001	**** (+)
	2	0.3366	ns	<0.0001	**** (+)
NimB5	1	0.1303	ns	<0.0001	**** (+)
	2	0.6702	ns	<0.0001	**** (+)
	3	0.3172	ns	0.0311	* (+)
NimC1	1	<0.0001	**** (-)	0.0013	** (-)
	2	<0.0001	**** (-)	<0.0001	**** (-)
crq	1	0.3432	ns	0.5440	ns
	2	0.0127	* (-)	0.0003	*** (+)
	3	<0.0001	**** (-)	<0.0001	**** (-)
pes	1	0.1198	ns	<0.0001	**** (+)
	2	0.3269	ns	0.0030	** (+)
	3	0.9677	ns	0.0180	* (+)
Tep1-/-	1	0.5270	ns	0.0077	** (+)
	2	0.0657	ns	<0.0001	**** (+)
	3	0.0716	ns	0.2228	ns
	4	0.3379	ns	0.0061	** (+)
	5	0.1561	ns	0.0946	ns
	6	<0.0001	**** (+)	0.0003	*** (+)
	7	0.1576	ns	0.0147	* (-)
Tep2-/-	1	0.0052	** (+)	0.5001	ns
	2	0.9723	ns	0.0009	*** (+)
	3	0.2812	ns	0.9756	ns
	4	0.1373	ns	0.0295	* (+)
	5	0.9800	ns	0.0412	* (+)
Tep3-/-	1	0.1735	ns	<0.0001	**** (-)
	2	0.2202	ns	0.0001	*** (+)
	3	0.1752	ns	<0.0001	**** (+)
Tep4-/-	1	0.0414	* (+)	<0.0001	**** (-)
	2	0.7429	ns	0.1630	ns
	3	0.4093	ns	0.4189	ns
TepqΔ	1	0.4795	ns	0.0785	ns
	2	0.0680	ns	<0.0001	**** (+)
	3	0.5473	ns	0.0048	** (+)
	4	0.9953	ns	0.1290	ns
	5	0.9953	ns	0.0789	ns
	6	0.2275	ns	0.9435	ns
Atg5	1	0.5871	ns	0.1613	ns
Atg8a	1	0.0028	** (-)	0.3274	ns
